# Supplementary material for: Draft genome of Dugesia japonica provides insights into conserved regulatory elements of the brain restriction gene nou-darake in planarians
Source: PubMed Central journal article supplement (PMC6114478; doi:10.1186/s40851-018-0102-2), 2018-08-29
Supplement: 40851_2018_102_MOESM1_ESM.pdf [file 40851_2018_102_MOESM1_ESM.pdf]

✘ Per base sequence quality

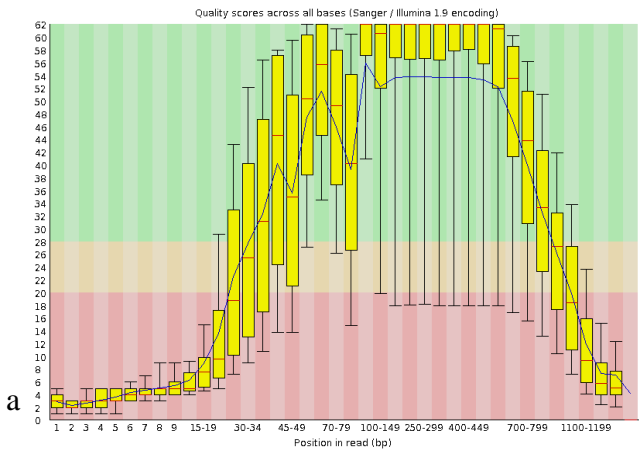

✔ Per base sequence quality

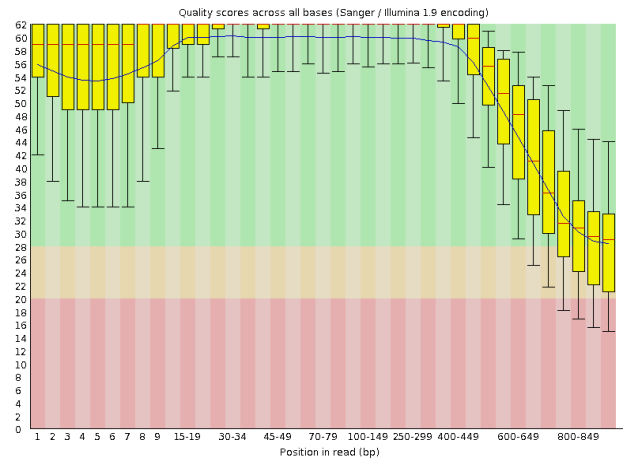

✘ Per base sequence quality

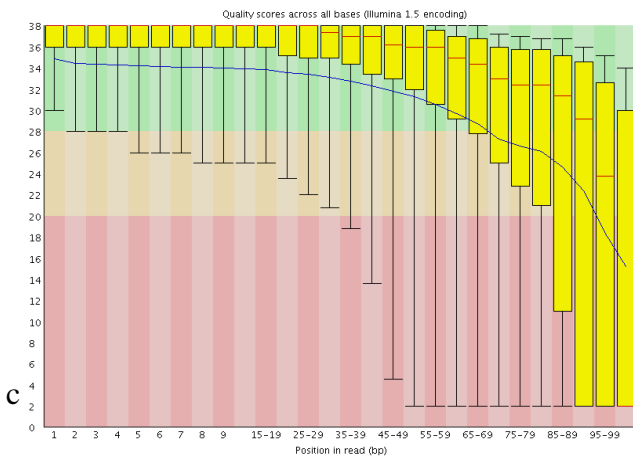

✔ Per base sequence quality

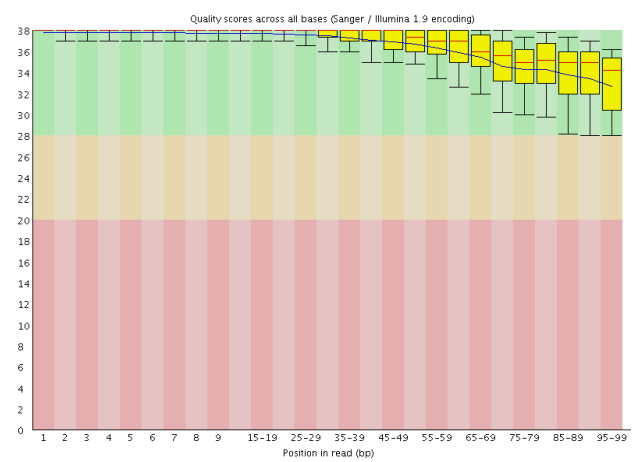

✘ Per base sequence quality

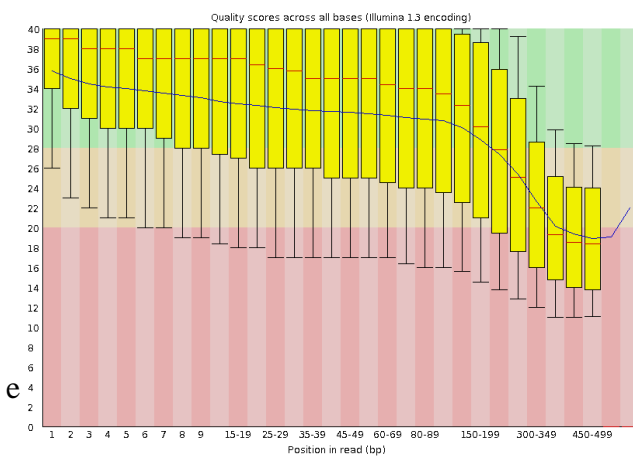

✔ Per base sequence quality

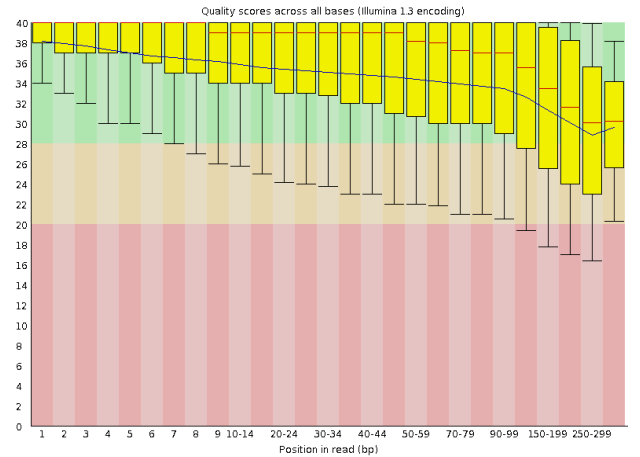

## Additional File 1. Quality control of sequencing reads

Sanger (a,b), Illumina (c,d), and Roche 454 (e,f) sequencing data
